# Supplementary material for: Interfacial chemical bond and internal electric field modulated Z-scheme Sv-ZnIn2S4/MoSe2 photocatalyst for efficient hydrogen evolution
Source: PubMed Central journal article supplement (PMC8257585; doi:10.1038/s41467-021-24511-z), 2021-07-05
Supplement: 41467_2021_24511_MOESM1_ESM.pdf [file 41467_2021_24511_MOESM1_ESM.pdf]

# Supporting Information

## Interfacial Chemical Bond and Internal Electric Field Modulated Z-Scheme S<sub>v</sub>-ZnIn<sub>2</sub>S<sub>4</sub>/MoSe<sub>2</sub> Photocatalyst for Efficient Hydrogen Evolution

Xuehua Wang<sup>1</sup>, Xianghu Wang<sup>2</sup>, Jianfeng Huang<sup>4</sup>, Shaoxiang Li<sup>5</sup>, Alan Meng<sup>2,\*</sup>, Zhenjiang Li<sup>1,3,5\*</sup>

<sup>1</sup> College of Materials Science and Engineering, Qingdao University of Science and Technology, Qingdao 266042, Shandong, P. R. China

<sup>2</sup> Key Laboratory of Optic-electric Sensing and Analytical Chemistry for Life Science, MOE. College of Chemistry and Molecular Engineering, Qingdao University of Science and Technology, Qingdao 266042, Shandong, P. R. China.

<sup>3</sup> College of Sino-German Science and Technology, Qingdao University of Science and Technology, Qingdao 266061, Shandong, P. R. China.

<sup>4</sup> School of Material Science and Engineering, International S&T Cooperation Foundation of Shaanxi Province, Xi'an Key Laboratory of Green Manufacture of Ceramic Materials, Shaanxi University of Science and Technology, Xi'an 710021, China

<sup>5</sup> Shandong Engineering Technology Research Center for Advanced Coating, Qingdao University of Science and Technology, Qingdao, 266042, P. R. China

\* Corresponding author.

E-mail address:

[zhenjiangli@qust.edu.cn](mailto:zhenjiangli@qust.edu.cn) (Z. J. Li); [alanmengqust@163.com](mailto:alanmengqust@163.com) (A. L. Meng)

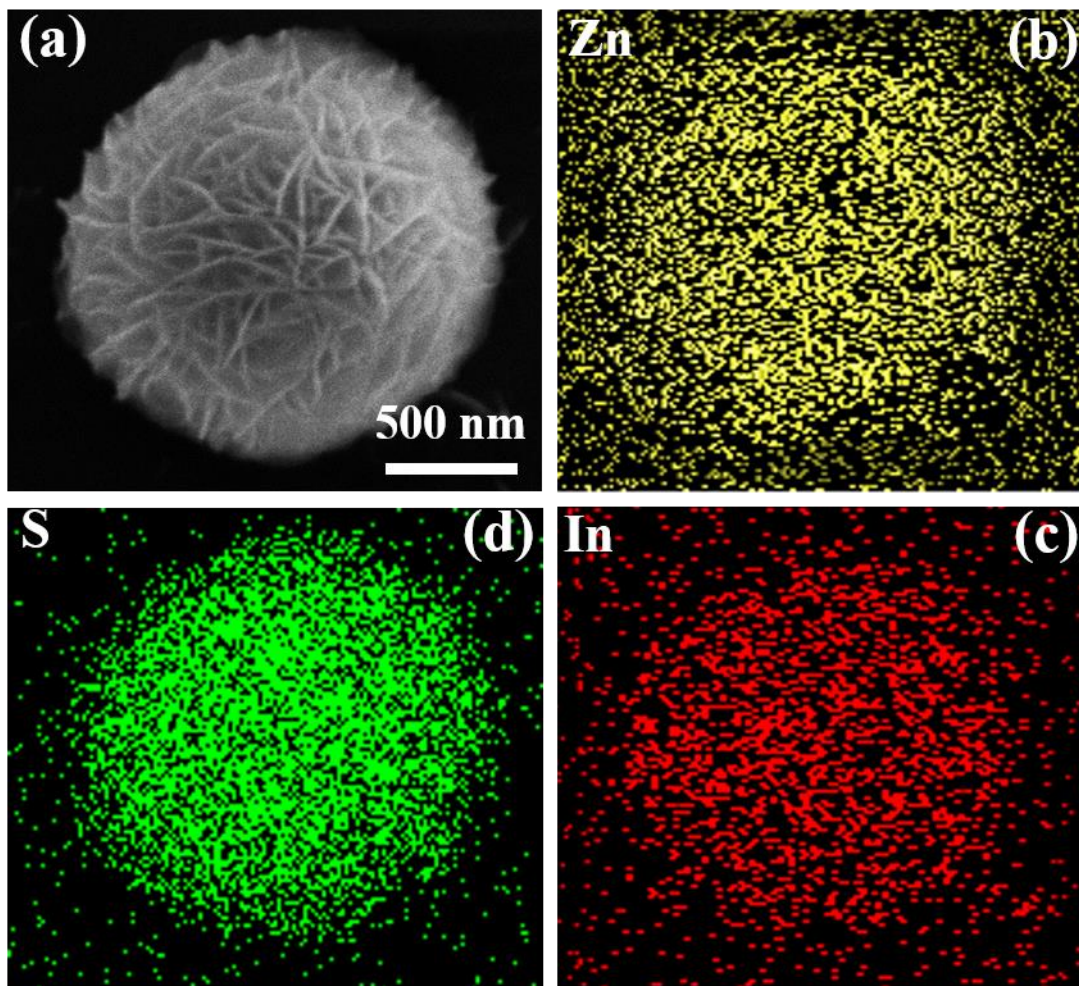

Fig. S1. Morphology characterizations of ZIS. a SEM, b-d the corresponding element mapping images of b Zn, c In and d S in ZIS

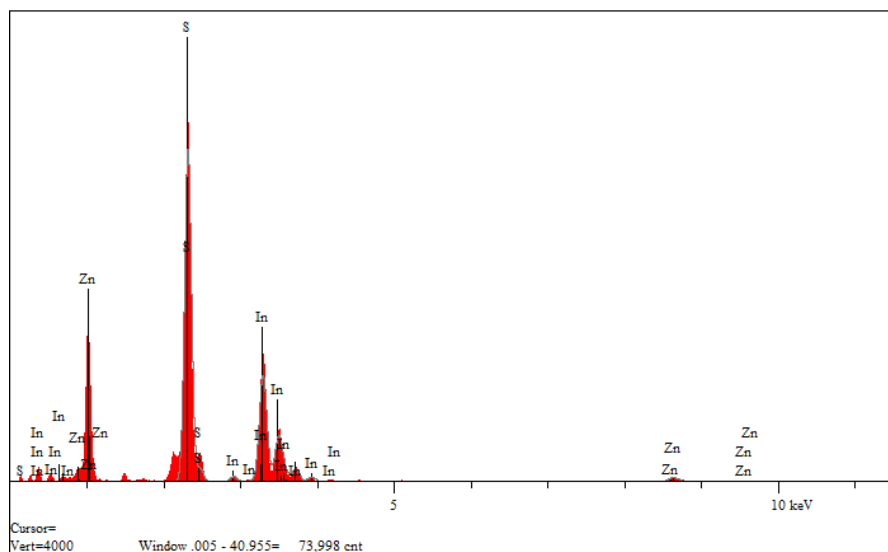

Fig. S2. EDS spectrum of ZIS.

Table S1. Elemental analyses of the ZIS photocatalyst by EDS.

| Element                      | Atomic (%) |
|------------------------------|------------|
| Zn                           | 14.33      |
| In                           | 26.49      |
| S                            | 59.18      |
| $Zn_{1.00}In_{1.85}S_{4.13}$ |            |

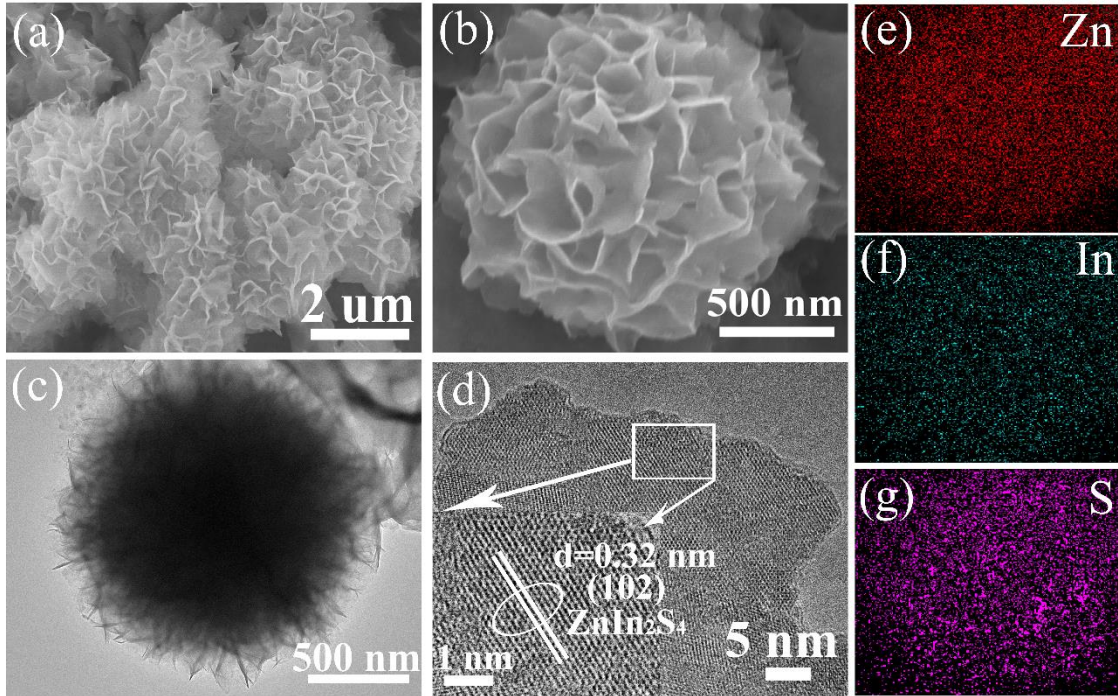

Fig.S3. Morphology characterizations of  $S_V$ -ZIS. a, b SEM, c, d TEM and HRTEM, e-g the corresponding element mapping images of c Zn, d In and e S.

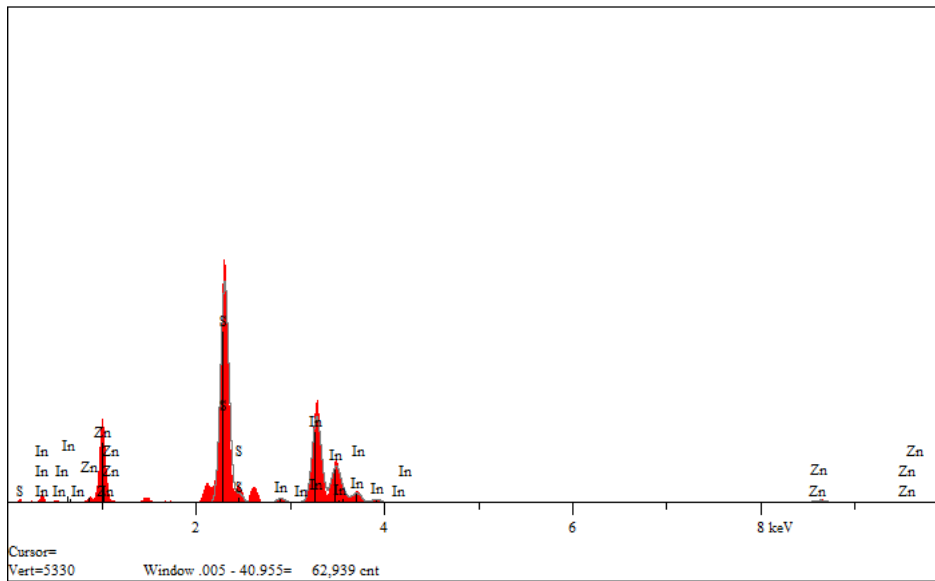

Fig. S4. EDS spectrum of  $S_V$ -ZIS.

Table S2. Elemental analyses of the S<sub>v</sub>-ZIS photocatalyst by EDS.

| Element                      | Atomic (%) |
|------------------------------|------------|
| Zn                           | 15.95      |
| In                           | 30.62      |
| S                            | 53.43      |
| $Zn_{1.00}In_{1.92}S_{3.35}$ |            |

Table S3. Elemental analyses of the S<sub>v</sub>-ZIS/MoSe<sub>2</sub> photocatalyst by EDS.

| Element                      | Weight (%) | Atomic (%) |
|------------------------------|------------|------------|
| Mo                           | 2.08       | 1.37       |
| Se                           | 2.54       | 2.04       |
| Zn                           | 16.43      | 15.89      |
| In                           | 52.81      | 29.06      |
| S                            | 26.14      | 51.64      |
| $Zn_{1.00}In_{1.83}S_{3.25}$ |            |            |

Table S4. Elemental analyses of the S<sub>v</sub>-ZIS/MoSe<sub>2</sub> photocatalyst by XPS.

| Theoretical chemical formula | ZIS                          |       |       | S <sub>v</sub> -ZIS          |       |       | S <sub>v</sub> -ZIS/MoSe <sub>2</sub> |       |       |
|------------------------------|------------------------------|-------|-------|------------------------------|-------|-------|---------------------------------------|-------|-------|
|                              | Zn                           | In    | S     | Zn                           | In    | S     | Zn                                    | In    | S     |
| Peak area ratio              | 0.235                        | 0.656 | 0.109 | 0.235                        | 0.673 | 0.092 | 0.235                                 | 0.668 | 0.097 |
| Atomic ratio                 | 0.042                        | 0.090 | 0.163 | 0.042                        | 0.093 | 0.138 | 0.042                                 | 0.090 | 0.141 |
| Actual chemical formula      | $Zn_{1.00}In_{2.15}S_{3.87}$ |       |       | $Zn_{1.00}In_{2.20}S_{3.29}$ |       |       | $Zn_{1.00}In_{2.14}S_{3.36}$          |       |       |

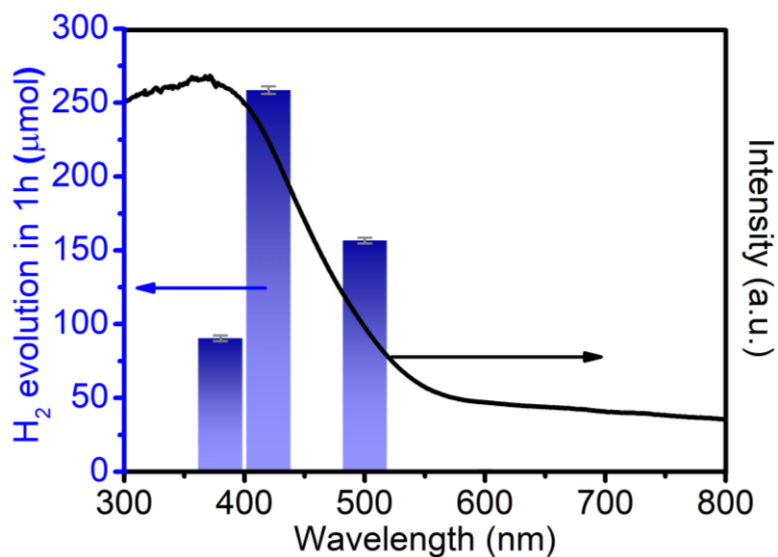

Fig. S5. Wavelength-dependent H<sub>2</sub> production rate in the presence of S<sub>V</sub>-ZIS/5.0MoSe<sub>2</sub>.

Table S5. The calculated AQY of S<sub>V</sub>-ZIS/MoSe<sub>2</sub> photocatalyst at different wavelengths.

| Wavelength | The mean H <sub>2</sub> production in 1 hour | Light power (Xe lamp) |
|------------|----------------------------------------------|-----------------------|
| 380 nm     | 90.46 μmol                                   | 0.034 W               |
| 420 nm     | 258.53 μmol                                  | 0.107 W               |
| 500 nm     | 156.66 μmol                                  | 0.140 W               |
| 600 nm     | 0.88 μmol                                    | 0.134 W               |

The apparent quantum yield (AQY) was measured following the same reaction conditions as photocatalytic test except that the incident light was supplied by a 300W Xe lamp equipped with specific band-pass filters to get the desired monochromatic incident wavelength ( $\lambda=380, 420, 500$  and  $600$  nm). AQY was roughly calculated based on the following equation:

$$\begin{aligned}
 AQY &= \frac{\text{the number of reacted electrons}}{\text{the number of incident photons}} \times 100\% \\
 &= \frac{4 \times \text{the number of } H_2 \text{ molecules}}{\text{the number of incident photons}} \times 100\% \\
 &= \frac{4 \times \text{the number of } H_2 \text{ molecules}}{N} \times 100\%
 \end{aligned}$$

$\lambda=380$  nm:

$$\begin{aligned}
 N &= \frac{E\lambda}{hc} = \frac{0.034 \times 3600 \times 380 \times 10^{-9}}{6.626 \times 10^{-34} \times 3 \times 10^8} = 2.34 \times 10^{20} \\
 AQY &= \frac{4 \times 90.46 \times 10^{-6} \times 6.02 \times 10^{23}}{2.34 \times 10^{20}} \times 100\% = 93.08\%
 \end{aligned}$$

$\lambda=420$  nm:

$$\begin{aligned}
 N &= \frac{E\lambda}{hc} = \frac{0.107 \times 3600 \times 420 \times 10^{-9}}{6.626 \times 10^{-34} \times 3 \times 10^8} = 8.14 \times 10^{20} \\
 AQY &= \frac{4 \times 258.53 \times 10^{-6} \times 6.02 \times 10^{23}}{8.14 \times 10^{20}} \times 100\% = 76.48\%
 \end{aligned}$$

$\lambda=500$  nm:

$$\begin{aligned}
 N &= \frac{E\lambda}{hc} = \frac{0.140 \times 3600 \times 500 \times 10^{-9}}{6.626 \times 10^{-34} \times 3 \times 10^8} = 1.46 \times 10^{21} \\
 AQY &= \frac{4 \times 156.66 \times 10^{-6} \times 6.02 \times 10^{23}}{1.27 \times 10^{21}} \times 100\% = 29.70\%
 \end{aligned}$$

$\lambda=600$  nm:

$$\begin{aligned}
 N &= \frac{E\lambda}{hc} = \frac{0.134 \times 3600 \times 600 \times 10^{-9}}{6.626 \times 10^{-34} \times 3 \times 10^8} = 1.46 \times 10^{21} \\
 AQY &= \frac{4 \times 0.88 \times 10^{-6} \times 6.02 \times 10^{23}}{1.46 \times 10^{21}} \times 100\% = 0.15\%
 \end{aligned}$$

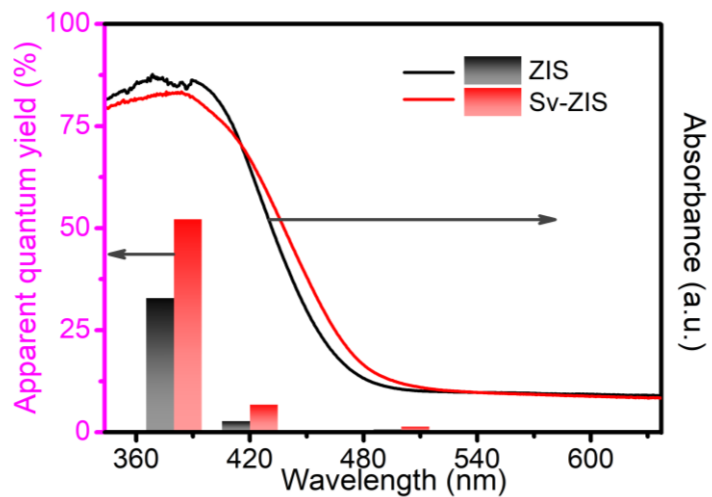

Fig. S6. Wavelength-dependent AQY for photocatalytic H<sub>2</sub> evolution of ZIS and Sv-ZIS.

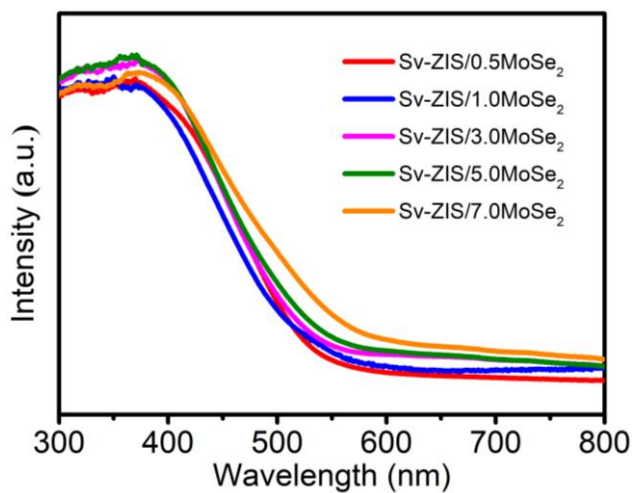

Fig. S7. UV-vis absorption spectra of Sv-ZIS/MoSe<sub>2</sub> with different mass ratio of MoSe<sub>2</sub> to ZIS.



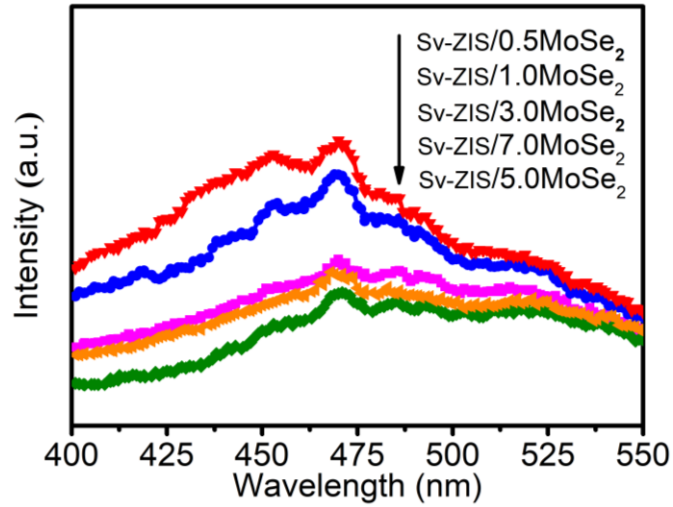

Fig. S8. Photoluminescence spectra (PL, excited at 375 nm) of  $S_v$ -ZIS/ $MoSe_2$  with different mass ratio of  $MoSe_2$  to ZIS.

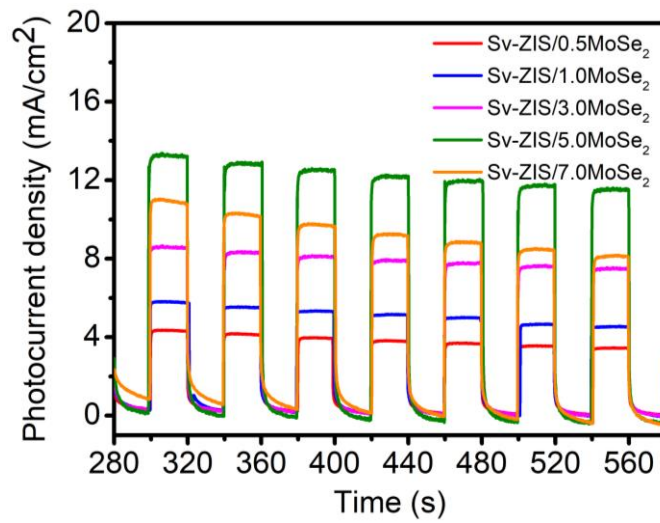

Fig. S9. Photocurrent response of  $S_v$ -ZIS/ $MoSe_2$  with different mass ratio of  $MoSe_2$  to ZIS.

Table S6. Comparison of representative ZnIn<sub>2</sub>S<sub>4</sub>-based photocatalysts for their H<sub>2</sub> evolution behavior recently.

| Photocatalysts                                                                                               | Light source             | H <sub>2</sub> evolution rate<br>(mmol·g <sup>-1</sup> ·h <sup>-1</sup> ) | AQE             | Refs |
|--------------------------------------------------------------------------------------------------------------|--------------------------|---------------------------------------------------------------------------|-----------------|------|
| <b>Co<sub>9</sub>S<sub>8</sub>/ZnIn<sub>2</sub>S<sub>4</sub></b>                                             | 300 W Xe lamp (λ>400 nm) | 9.039                                                                     | 4.49% at 420 nm | 1    |
| <b>Co<sub>9</sub>S<sub>8</sub>@ZnIn<sub>2</sub>S<sub>4</sub></b>                                             | 300 W Xe lamp, λ>400 nm  | 6.250                                                                     | /               | 2    |
| <b>ZnIn<sub>2</sub>S<sub>4</sub>-Ti<sub>3</sub>C<sub>2</sub>T<sub>x</sub> (3 wt% Pt co-catalyst)</b>         | 300 W Xe lamp, λ>420 nm  | 3.475                                                                     | 11.14 at 420 nm | 3    |
| <b>Zn<sub>2</sub>In<sub>2</sub>S<sub>5</sub>/Ti<sub>3</sub>C<sub>2</sub>(O, OH) x (2 wt% Pt co-catalyst)</b> | 300 W Xe lamp, λ>420 nm  | 2.596                                                                     | 8.96% at 420 nm | 4    |
| <b>g-C<sub>3</sub>N<sub>4</sub>/Aminated-ZnIn<sub>2</sub>S<sub>4</sub> (1 wt% Pt co-catalyst)</b>            | 300 W Xe lamp            | 4.851                                                                     | /               | 5    |
| <b>N-doped ZnIn<sub>2</sub>S<sub>4</sub></b>                                                                 | 300 W Xe lamp, λ>400 nm  | 11.086                                                                    | 16.6% at 420 nm | 6    |
| <b>UiO-66-(COOH)<sub>2</sub>/ZnIn<sub>2</sub>S<sub>4</sub>/MoS<sub>2</sub></b>                               | 300 W Xe lamp            | 18.794                                                                    | /               | 7    |
| <b>Ag<sub>x</sub>Au<sub>1-x</sub>/ZnIn<sub>2</sub>S<sub>4</sub></b>                                          | 300 W Xe lamp, λ>420 nm  | 5.401                                                                     | 8.06% at 420 nm | 8    |
| <b>Zn<sub>3</sub>In<sub>2</sub>S<sub>6</sub>/FCN (2 wt% Pt co-catalyst)</b>                                  | 300 W Xe lamp, λ>420 nm  | 0.510                                                                     | /               | 9    |
| <b>ZnIn<sub>2</sub>S<sub>4</sub>/1%MoSe<sub>2</sub></b>                                                      | 300 W Xe lamp, λ>400 nm  | 6.454                                                                     | /               | 10   |
| <b>Co/NGC@ZnIn<sub>2</sub>S<sub>4</sub></b>                                                                  | 300 W Xe lamp, λ>400 nm  | 11.270                                                                    | 5.07% at 420 nm | 11   |
| <b>NiS/Vs-ZnIn<sub>2</sub>S<sub>4</sub>/WO<sub>3</sub></b>                                                   | 300 W Xe lamp, λ>400 nm  | 11.090                                                                    | 72% at 420 nm   | 12   |
| <b>ultra-thin ZnIn<sub>2</sub>S<sub>4</sub>/protonated g-C<sub>3</sub>N<sub>4</sub></b>                      | 300 W Xe lamp, λ>400 nm  | 8.601                                                                     | 0.92% at 400 nm | 13   |
| <b>Ni<sub>2</sub>P/ZnIn<sub>2</sub>S<sub>4</sub></b>                                                         | 300 W Xe lamp, λ>420 nm  | 2.066                                                                     | 7.7% at 420 nm  | 14   |
| <b>ZnIn<sub>2</sub>S<sub>4</sub>@NH<sub>2</sub>-MIL-125(Ti)</b>                                              | 300 W Xe lamp, λ>420 nm  | 2.204                                                                     | 4.3% at 420 nm  | 15   |

|                                                                                   |                                                        |              |                         |                  |
|-----------------------------------------------------------------------------------|--------------------------------------------------------|--------------|-------------------------|------------------|
| <b>Cubic/hexagonal ZnIn<sub>2</sub>S<sub>4</sub> heterophase junctions</b>        | 300 W Xe lamp, $\lambda > 420$ nm                      | 3.806        | 18.67% at 420 nm        | 16               |
| <b>ZnIn<sub>2</sub>S<sub>4</sub>/MoSe<sub>2</sub></b>                             | 300 W Xe lamp, $\lambda > 420$ nm                      | 2.228        | 21.39% at 420 nm        | 17               |
| <b>2D/2D g-C<sub>3</sub>N<sub>4</sub> nanosheet@ZnIn<sub>2</sub>S<sub>4</sub></b> | 300 W Xe lamp, $\lambda > 420$ nm                      | 2.780        | /                       | 18               |
| <b>Hydrogenated ZnIn<sub>2</sub>S<sub>4</sub></b>                                 | 300 W Xe lamp, $\lambda > 320$ nm                      | 0.215        | 13.2% at 420 nm         | 19               |
| <b>MoS<sub>2</sub>/ZnIn<sub>2</sub>S<sub>4</sub></b>                              | 300 W Xe lamp, $\lambda > 400$ nm                      | 8.898        | /                       | 20               |
| <b>Half-unit-cell ZnIn<sub>2</sub>S<sub>4</sub></b>                               | 300 W Xe lamp, $\lambda > 400$ nm                      | 13.478       | 53.68% at 365 nm        | 21               |
| <b>Zn<sub>m</sub>In<sub>2</sub>S<sub>m+3</sub>@In<sub>2</sub>S<sub>3</sub></b>    | 300 W Xe lamp, $\lambda > 420$ nm                      | 3.300        | /                       | 22               |
| <b>S<sub>v</sub>-ZnIn<sub>2</sub>S<sub>4</sub>/MoSe<sub>2</sub></b>               | <b>300 W Xe lamp, <math>\lambda &gt; 420</math> nm</b> | <b>63.21</b> | <b>76.48% at 420 nm</b> | <b>This work</b> |

## References

1. Zhang, G. et al. Construction of hierarchical hollow  $\text{Co}_9\text{S}_8/\text{ZnIn}_2\text{S}_4$  tubular heterostructures for highly efficient solar energy conversion and environmental remediation. *Angew. Chem. Int. Ed.* **59**, 8255-8261 (2020).
2. Wang, S. Guan, B. Wang, X. & Lou, X. Formation of hierarchical  $\text{Co}_9\text{S}_8@\text{ZnIn}_2\text{S}_4$  heterostructured cages as an efficient photocatalyst for hydrogen evolution. *J. Am. Chem. Soc.* **140**, 15145-15148 (2018).
3. Zuo, G. et al. Ultrathin  $\text{ZnIn}_2\text{S}_4$  nanosheets anchored on  $\text{Ti}_3\text{C}_2\text{T}_x$  MXene for photocatalytic  $\text{H}_2$  evolution. *Angew. Chem. Int. Ed.* **59**, 11287-11292 (2020).
4. Wang, H. et al. Electrical promotion of spatially photoinduced charge separation via interfacial-built-in quasi-alloying effect in hierarchical  $\text{Zn}_2\text{In}_2\text{S}_5/\text{Ti}_3\text{C}_2(\text{O},\text{OH})_x$  hybrids toward efficient photocatalytic hydrogen evolution and environmental remediation. *Appl. Catal. B: Environ.* **245**, 290-301 (2019).
5. Gao, Z. et al. Aminated flower-like  $\text{ZnIn}_2\text{S}_4$  coupled with benzoic acid modified  $\text{g-C}_3\text{N}_4$  nanosheets via covalent bonds for ameliorated photocatalytic hydrogen generation. *Appl. Catal. B: Environ.* **268**, 118462 (2020).
6. Du, C. Yan, B. Lin, Z. & Yang, G. Enhanced carrier separation and increased electron density in 2D heavily N-doped  $\text{ZnIn}_2\text{S}_4$  for photocatalytic hydrogen production. *J. Mater. Chem. A.* **8**, 207-217 (2020).
7. Mu, F. et al. Construction of 3D hierarchical microarchitectures of Z-scheme  $\text{UiO-66}-(\text{COOH})_2/\text{ZnIn}_2\text{S}_4$  hybrid decorated with non-noble  $\text{MoS}_2$  cocatalyst: A highly efficient photocatalyst for hydrogen evolution and  $\text{Cr(VI)}$  reduction. *Chem. Eng. J.* **384**, 123352 (2020).

8. An, H. Li, M. Liu, R. Gao, Z. & Yin, Z. Design of  $\text{Ag}_x\text{Au}_{1-x}$  alloy/ $\text{ZnIn}_2\text{S}_4$  system with tunable spectral response and Schottky barrier height for visible-light-driven hydrogen evolution. *Chem. Eng. J.* **382**, 122953 (2020).
9. Wu, Y. et al. Construction of hierarchical 2D-2D  $\text{Zn}_3\text{In}_2\text{S}_6$ /fluorinated polymeric carbon nitride nanosheets photocatalyst for boosting photocatalytic degradation and hydrogen production performance. *Appl. Catal. B: Environ.* **233**, 58-69 (2018).
10. Yang, M. et al. Self-surface charge exfoliation and electrostatically coordinated 2D hetero-layered hybrids. *Nat. Commun.* **8**, 14224 (2017).
11. Wang, S. et al. Supporting ultrathin  $\text{ZnIn}_2\text{S}_4$  nanosheets on Co/N-doped graphitic carbon nanocages for efficient photocatalytic  $\text{H}_2$  generation. *Adv. Mater.* **31**, 1903404 (2019).
12. Li, Z. et al. Two-dimensional Janus heterostructures for superior Z-scheme photocatalytic water splitting. *Nano Energy.* **59**, 537-544 (2019).
13. Yang, H. et al. Constructing electrostatic self-assembled 2D/2D ultra-thin  $\text{ZnIn}_2\text{S}_4$ /protonated g- $\text{C}_3\text{N}_4$  heterojunctions for excellent photocatalytic performance under visible light. *Appl. Catal. B: Environ.* **256**, 117862 (2019).
14. Li, X. et al. Fabrication of two-dimensional  $\text{Ni}_2\text{P}/\text{ZnIn}_2\text{S}_4$  heterostructures for enhanced photocatalytic hydrogen evolution. *Chem. Eng. J.* **353**, 15-24 (2018).
15. Liu, H. Zhang, J. & Ao, D. Construction of heterostructured  $\text{ZnIn}_2\text{S}_4$ @ $\text{NH}_2$ -MIL-125(Ti) nanocomposites for visible-light-driven  $\text{H}_2$  production. *Appl. Catal. B: Environ.* **221**, 433-442 (2018).

16. Wang, J. et al. Cubic quantum dot/hexagonal microsphere ZnIn<sub>2</sub>S<sub>4</sub> heterophase junctions for exceptional visible-light-driven photocatalytic H<sub>2</sub> evolution. *J. Mater. Chem. A*, **5**, 8451-8460 (2017).
17. Zeng, D. et al. Hierarchical ZnIn<sub>2</sub>S<sub>4</sub> /MoSe<sub>2</sub> nanoarchitectures for efficient noble-metal-free photocatalytic hydrogen evolution under visible light. *ChemSusChem*, **10**, 4624-4631 (2017).
18. Lin, B. et al. Preparation of 2D/2D g-C<sub>3</sub>N<sub>4</sub> nanosheet@ZnIn<sub>2</sub>S<sub>4</sub> nanoleaf heterojunctions with well-designed high-speed charge transfer nanochannels towards high-efficiency photocatalytic hydrogen evolution. *Appl. Catal. B: Environ.* **220**, 542-552 (2018).
19. Zhu, Y. Wang, L. Liu, Y. Shao, L. & Xia, X. In-situ hydrogenation engineering of ZnIn<sub>2</sub>S<sub>4</sub> for promoted visible-light water splitting. *Appl. Catal. B: Environ.* **241**, 483-490 (2019).
20. Li, W. Lin, Z. & Yang, G. A 2D self-assembled MoS<sub>2</sub>/ZnIn<sub>2</sub>S<sub>4</sub> heterostructure for efficient photocatalytic hydrogen evolution. *Nanoscale*. **9**, 18290-18298 (2017).
21. Du, C. et al. Half-unit-cell ZnIn<sub>2</sub>S<sub>4</sub> monolayer with sulfur vacancies for photocatalytic hydrogen evolution. *Appl. Catal. B: Environ.* **48**, 193-201 (2019).
22. Li, Y. Han, P. Hou, Y. Peng, S. & Kuang, X. Oriented ZnIn<sub>2</sub>S<sub>m+3</sub>@In<sub>2</sub>S<sub>3</sub> heterojunction with hierarchical structure for efficient photocatalytic hydrogen evolution. *Appl. Catal. B: Environ.* **244**, 604-611 (2019).
